# Supplementary material for: Dynamic evolution of inverted repeats in Euglenophyta plastid genomes
Source: PubMed Central journal article supplement (PMC6207741; doi:10.1038/s41598-018-34457-w), 2018-10-30
Supplement: 41598_2018_34457_MOESM1_ESM.pdf [file 41598_2018_34457_MOESM1_ESM.pdf]

## **Dynamic evolution of inverted repeats in Euglenophyta plastid genomes**

Anna Karnkowska, Matthew S. Bennett, Richard E. Triemer

Supplementary Table S1. Assembly details for the taxa obtained in this study.

| <b>Taxa</b>                       | <b>Assembly</b> | <b>Length</b> | <b>No. of reads</b> | <b>Average coverage depth</b> |
|-----------------------------------|-----------------|---------------|---------------------|-------------------------------|
| <i>Discoplastis spathirhyncha</i> | Contig1         | 73,569 bp     | 2,018,259           | 2,521                         |
|                                   | Contig2         | 5,211bp       | 259,034             | 4,365                         |
| <i>Lepocinclis ovum</i>           | Contig1         | 60,008 bp     | 12,461              | 31                            |
|                                   | Contig2         | 4,817 bp      | 1,660               | 51                            |
| <i>L. playfairiana</i>            | Contig1         | 44,452bp      | 21,971              | 71                            |
|                                   | Contig2         | 20,256bp      | 9,272               | 68                            |
|                                   | Contig3         | 4,823bp       | 3,771               | 115                           |
| <i>L. steinii</i>                 | Contig1         | 71,359bp      | 24,497              | 51.6                          |
|                                   | Contig2         | 5,204bp       | 2,724               | 77                            |
| <i>L. tripteris</i> (MI)          | Contig1         | 70,204bp      | 66,184              | 145                           |
|                                   | Contig2         | 6,623bp       | 5,722               | 129                           |
|                                   | Contig3         | 1,700bp       | 200                 | 18                            |
| <i>L. tripteris</i> (UTEX)        | Contig1         | 80,808bp      | 133,412             | 258                           |
| <i>Phacus inflexus</i>            | Contig1         | 55,874bp      | 125,849             | 338                           |
| <i>P. pleuronectes</i>            | Contig1         | 92,122bp      | 81,375              | 134                           |

Supplementary Table S2. The set of primers designed to confirm the presence of inverted repeats. The name of primers reflects the name of the gene they matched.

|                                    |
|------------------------------------|
| <b><i>D. spathirhyncha</i></b>     |
| Q(UUG): TGATTTGGAGGTTCTGAAT        |
| 23S: TGGATAACTGCTGAAAGCATA         |
| 23S: TGGATAACTGCTGAAAGCATA         |
| chlI: GGACTTGAAAACATTTGA           |
| <b><i>L. ovum</i></b>              |
| 23S: GTGGATAACTGCTGAAAGCATA        |
| rps4: CTACCTCTATATCGTGACAT         |
| 23S: GTGGATAACTGCTGAAAGCATA        |
| L(CAA): TCGTGGTGAATGGTATACAC       |
| <b><i>L. playfairiana</i></b>      |
| rps4: CTACCTCTATAACGTGACAT         |
| 23S: GTGGATAACTGCTGAAGGCATA        |
| 23S: GTGGATAACTGCTGAAGGCATA        |
| L(CAA): TCGTGGTGAATGGTATACAC       |
| <b><i>L. steinii</i></b>           |
| rps4: CTACCTCGATAACGCGACAT         |
| 23S: GTGGATAACTGCTGAAGGCATA        |
| 23S: GTGGATAACTGCTGAAGGCATA        |
| L(CAA): TCGTGGTGAATGGTATACAC       |
| <b><i>L. tripteris (MI)</i></b>    |
| 23S: GTGGATAACTGCTGAAGGCAT         |
| L(CAA): GCCTAAGGCTTGCCGGTTC        |
| rps4: TTCTTAAACGTGGCCTTTA          |
| 23S: GTGGATAACTGCTGAAGGCAT         |
| <b><i>L. tripteris (UTEX)</i></b>  |
| rps4: TTCTTAAACGCGGCCTTTA          |
| 23S: GTGGATAACTGCTGAAGGCAT         |
| 23S: GTGGATAACTGCTGAAGGCAT         |
| L(CAA): GCCTAAGGCTTGCCGGTTC        |
| <b><i>P. inflexus</i></b>          |
| 16S: AGCGTTCATCCTGAGCCAGGATCAA     |
| L(CAA): TGAATCACGCATGTATACCA       |
| <b><i>P. pleuronectes</i></b>      |
| intergenic: ACTAGTCTTGCTTAGTTTTTAC |
| L(CAA): ACGTGTCTACCATTTACCAT       |

Supplementary Table S3. Euglenophyta and Chlorophyta outgroup taxa used for phylogenomic analyses along with their accession numbers.

| <b>Taxon name</b>                   | <b>Accession number</b> |
|-------------------------------------|-------------------------|
| <i>Cryptoglana skujae</i>           | KP410781                |
| <i>Discoplastis spathirhyncha</i>   | MH898670                |
| <i>Euglena archaeoplastidiata</i>   | KP939040                |
| <i>Euglenaformis proxima</i>        | KC684276                |
| <i>Euglena gracilis</i>             | X70810                  |
| <i>Euglena mutabilis</i>            | KT223519                |
| <i>Euglena viridis</i>              | JQ237893                |
| <i>Euglenaria anabaena</i>          | KP453743                |
| <i>Eutreptia viridis</i>            | JN643723                |
| <i>Eutreptiella gymnastica</i>      | NC_017754               |
| <i>Eutreptiella pomquetensis</i>    | KY706202                |
| <i>Lepocinclis ovum</i>             | MH898674                |
| <i>Lepocinclis playfairiana</i>     | MH898671                |
| <i>Lepocinclis steinii</i>          | MH898672                |
| <i>Lepocinclis tripteris</i> (MI)   | MH898668                |
| <i>Lepocinclis tripteris</i> (UTEX) | MH898669                |
| <i>Monomorphina aenigmatica</i>     | JX457480                |
| <i>Monomorphina parapyrum</i>       | KP455987                |
| <i>Phacus inflexus</i>              | MH898667                |
| <i>Phacus orbicularis</i>           | KR921747                |
| <i>Phacus pleuronectes</i>          | MH898673                |
| <i>Strombomonas acuminata</i>       | JN674637                |
| <i>Trachelomonas volvocina</i>      | KP686077                |
| <i>Ostreococcus tauri</i>           | CR954199                |
| <i>Pycnococcus provasolii</i>       | FJ493498                |
| <i>Pyramimonas parkeae</i>          | FJ493499                |

Supplementary File 1. The custom python script to find 3' motifs for group III twintrons.

```
#####  
#  
#           Search for Group III twinton 3' motifs  
#  
# A program to find 3' motifs for group III twintrons,  
# given the external intron in FASTA # format.  
#  
# ** Program must be in same location as fasta file. **  
#  
# Assumption: only one sequence submitted in fasta file.  
#  
# by: Matthew Bennett, Michigan State University  
#  
#####  
  
# Function to complement a sequence  
def complement(sequence):  
    complement = ""  
    for i in sequence:  
        if i == "A":  
            complement += "T"  
        elif i == "T":  
            complement += "A"  
        elif i == "C":  
            complement += "G"  
        elif i == "G":  
            complement += "C"  
  
    return complement  
  
matches = [] #Blank list for potential 3' matches.  
  
while True:  
    try:  
        file_nm = input("FASTA file containg your external intron: ")  
        file = open(file_nm, "r")  
        break  
    except FileNotFoundError:  
        print ("\n", "FASTA file not found", "\n", sep = "")  
  
#First line in FASTA is sequence name, strip of white space and get rid of ">"  
seq_name = file.readline().strip()[1:]  
# Second fasta line is sequence, strip of white space  
seq = file.readline().strip()
```

```

# Strip the first 5 bases and last 5 bases, they only apply to external intron
seq = seq[5:-5]
# Reverse the sequence
rev_seq = seq[::-1]

# iterate through sequence and find an "A" to look for pattern:
# abcdef (3–8 nucleotides) f'e'd' A c'b'a' (four nucleotides)
for i, base in enumerate(rev_seq):
    if base == "A":
        index = i
        search_seq_rev = rev_seq[(index-3):index] + rev_seq[(index+1):(index+4)]
        search_area_rev = rev_seq[(index+7):(index + 18)]
        search_seq_rc = complement(search_seq_rev)

        if len(search_seq_rev) == 6:
            search_area = search_area_rev[::-1]
            check = search_area.find(search_seq_rc)

            if check != -1:
                total_area_rev = rev_seq[(index-3):(index + 18)]
                total_area = total_area_rev[::-1]
                match_area = total_area[check:]
                match = (match_area)
                matches.append(match)

print ("\n", len(matches), " potential 3' motif(s) found in ", \
      file_nm, ":", "\n", sep = "")

for i in matches:
    print (i)

if len(matches) > 0:
    print ("\n", "**** Remember to add 4 bases to the end of any accepted \
    matching sequence ****", "\n", sep = "")

```
